# Cooperative and non-cooperative behaviour in the exploitation of a common renewable resource with environmental stochasticity

Michael Hackney<sup>a,b</sup>, Alex James<sup>a,b</sup>, Michael J. Plank<sup>a,b,\*</sup>

<sup>a</sup>*School of Mathematics and Statistics, University of Canterbury, Christchurch 8140, New Zealand*

<sup>b</sup>*Te Pūnaha Matatini, Centre of Research Excellence, New Zealand*

---

## Abstract

Classical fisheries biology aims to optimise fisheries-level outcomes, such as yield or profit, by controlling the fishing effort. This can be adjusted to allow for the effects of environmental stochasticity, or noise, in the population dynamics. However, when multiple fishing entities, which could represent countries, commercial organisations, or individual vessels, can autonomously determine their own fishing effort, the optimal action for one fishing entity depends on the actions of others. Coupled with noise in the population dynamics, and with decisions about fishing effort made repeatedly, this becomes an iterated stochastic game. We tackle this problem using the tools of stochastic optimisation, first for the monopolist's problem and then for the duopolist's problem. In each case, we derive optimal policies that specify the best level of fishing effort for a given stock biomass. Under these optimal policies, we can calculate the equilibrium stock biomass, the expected long-term return from fishing and the probability of stock collapse. We also show that there is a threshold stock biomass below which it is optimal to stop fishing until the stock recovers. We then develop an agent-based model to test the effectiveness of simple strategies for responding to deviations by an opponent from a cooperative fishing level. Our results show that the economic value of the fishery to a monopolist, or to a consortium of fishing agents, is robust to a certain level of noise. However, without the means of making agreements about fishing effort, even low levels of noise make sustained cooperation between autonomous fishing agents difficult.

*Keywords:* fisheries management, Markov decision process, Nash equilibrium, stochastic game, stochastic optimisation, stock–recruitment relationship

---

\*Corresponding author email address: michael.plank@canterbury.ac.nz

## 1. Introduction

Fish stocks are noisy [1, 2]. Sources of noise include: seasonality and variations in climatic conditions [3, 4]; interspecific interactions [5]; variations in nutrient availability [6]; spatial heterogeneity [7, 8]; differences in individual characteristics [9, 10]; and individual fecundity [11, 12]. Noise can affect population sizes continuously throughout the growing season, and in discrete episodes such as spawning events. Variability in recruitment is one the largest sources of noise [1, 6, 13].

A Markov decision process is a stochastic optimisation tool that couples a stochastic process with a series of decisions and associated payoffs [14]. A solution to a Markov decision process is a policy, which specifies the action to take as a function of the current state of the process, that maximises the total expected payoff over the lifetime of the process [15, 16]. Markov decision processes have been used to model optimal fishing efforts in the presence of environmental noise [17, 18]. These have been applied to age- and sex-structured populations [19, 20], multi-species fisheries [21], and in situations with incomplete information [22].

Classical fisheries biology is concerned with finding the fishing mortality rate that optimises fishery-level outcomes [23]. This applies in a situation where fishing effort is centrally controlled by a single regulator or a consortium of all relevant stakeholders. However, it does not apply in cases where multiple fishing entities independently set their own fishing efforts to meet their own objectives [24]. Fishing entities could be any unit with access to the fishery that has autonomy over its own fishing effort, and could represent countries, commercial organisations, or vessels. Decision-making by multiple fishing entities harvesting a shared stock is a game-theoretic problem because the state of the stock, and therefore each entity's catch, is affected by the actions of the other fishers.

McKelvey [25] contextualised multinational fisheries management as involving brief and intense fish wars characterised by withdrawals from cooperative agreements, economic downturns in fishing communities, and heavily depleted fish stocks. Non-cooperative game theory offers a route to understanding such conflicts. Game theory has been used to investigate decisions about fishing effort by two countries exploiting a shared or partially shared fish stock [25–28], and to evaluate the allocation of spatio-temporal allocation of fishing [24, 29]. Martin-Herran and Rincón-Zapatero [30] and Chiarella et al. [28] found conditions under which games representing fisheries have Nash equilibria that are Pareto efficient. This is of interest because Pareto efficient solutions are socially optimal and it is unusual for Nash equilibria to have this property. Game theoretic concepts have also been used in models of small-scale fisheries with a population of autonomous fishing agents [31, 32]. These studies showed that an approximate Nash equilibrium emerged among fishing agents and produced a pattern of fishing selectivity that was well matched with the natural productivity of ecosystem components. However, the open-access case, where there is no prescribed limit to fishing effort, resulted in overfishing. The emergence of a Nash equilibrium among fishing agents is analogous to the ideal free distribution of foraging theory [33, 34], which predicts that that foraging effort is spatially distributed in proportion to resource productivity [35, 36]. This concept has also been applied to fleet dynamics to quantify the spatial distribution of fishing effort [37–39].

Most modelling studies that take a game theoretic approach to decisions about fishing effort do not explicitly account for the effects of noise in the fish stock. McKelvey [25] modelled an interception

fishery, where the stock is harvested sequentially by two competing countries as it migrates through their exclusive economic zones, but only included stochasticity in the payoff function, not in the stock itself. Sobel [40] considered a stochastic game model of a fishery, which required that the probability of the process transitioning to a given state could only depend on the current action and not the current state. This is unrealistic for most fishing scenarios, where the spawning stock biomass in one year is a significant determinant of biomass in subsequent years. The absence of noise from most game theoretic models is an important limitation because noise not only has a major effect on stock biomass, and therefore the likelihood of overfishing, but also on the information available to fishing agents when deciding on their fishing effort.

In this paper, we present a new method for calculating optimal fishing effort, both for a monopolist and a duopolist, in noisy conditions. A fishing agent's optimal effort in any given period is the effort that maximises that agent's total expected future net profits, given the current stock biomass. First, we formulate the monopolist's problem as a Markov decision process [14]. The state variable, representing stock biomass, and the action variable, representing fishing effort, are both continuous. A solution to this process is a policy that specifies the optimal fishing effort for any level of stock biomass.

Secondly, we extend our analysis to the case of a duopolist by reformulating the model as a stochastic Markov game [41]. A Nash equilibrium solution of the Markov game is a solution in which, in any given period, both players are following a policy that is a best response to the other player's policy. Although finite Markov decision processes have a (possibly non-unique) stationary optimal policy [14], this is not necessarily the case for Markov games [42, 43]. Most work on stochastic games has focused on the zero-sum case, which does have a unique Nash equilibrium [42], whereas the problem considered here gives rise to a non-zero-sum game. Methods used to solve non-zero-sum stochastic games include value iteration [44], policy iteration [41, 45, 46], and reinforcement learning [47, 48]. Here, we use a method that is based on value iteration but makes use of the symmetry of the problem. This method always converges to a solution known as a stationary open-loop equilibrium, meaning that players' actions depend on the current state of the process and the anticipated current and future actions of the other player, but not the previous actions of the other player [49]. Open-loop equilibria are analytically tractable, but restrict the type of strategies that fishing agents may use. We therefore formulate an agent-based model to evaluate the effectiveness of simple closed-loop strategies, in which players can modify their actions based on their beliefs about their opponent's previous actions [27].

We show that the decision problem faced by two autonomous agents (i.e. duopolists) that cannot make binding agreements has the structure of prisoner's dilemma. We show that the presence of noise in the fish stock drastically reduces the potential for cooperation between duopolists. Intuitively, this occurs because, in years when the biomass is lower than expected, it is impossible for a duopolist to know whether this is caused by noise or by "cheating" (i.e. higher than mutually optimal levels of fishing effort) by their opponent.

## 2. Markov decision process model

### 2.1. Stock biomass model

The stock biomass model consists of two components: an ecological component representing the change in population biomass due to natural mortality and recruitment from one year to the next; a harvesting component representing reduction in biomass due to fishing. Generational spawning is common in fish species, typically occurring annually [50–52], over short spawning seasons [53]. We therefore assume that recruitment occurs as discrete, annual events, whereas harvesting occurs continuously throughout the year.

Firstly, for the ecological component, we use a Beverton–Holt function plus a normally distributed noise term. The Beverton–Holt function is a classical stock–recruitment relationship, modelling density-dependent adult spawning and larval survival [54]. The noise term represents stochasticity in the recruitment process and is assumed to be independent from one year to the next. Under this model, the biomass after recruitment in year  $n$  is given by

$$R_n = \begin{cases} f(x_n) + Z_n, & x_n > 0 \text{ \& } f(x_n) + Z_n > 0, \\ 0, & \text{otherwise,} \end{cases} \quad (1)$$

where  $x_n$  is the biomass at the beginning of year  $n$ ,  $Z_n$  are independent, identically distributed normal random variables  $N(0, \sigma^2)$  and  $f$  is the Beverton–Holt function defined by

$$f(x) = \frac{Kx}{x + (K - x)e^{-rT}}, \quad (2)$$

where  $r$  is the intrinsic growth rate and  $K$  is the carrying capacity. The parameter  $\sigma$  represents the magnitude of the noise in the ecological dynamics. Note that if the biomass ever becomes non-positive, it is assumed to remain at zero for all future time representing extirpation of the stock, i.e. zero is an absorbing state of the stochastic process.

For the harvesting component of the model, we assume that in year  $n$  the total fishing mortality rate  $F_n$  is constant throughout the year. For simplicity we assume that all other sources of mortality are accounted for by the map in Eq. (1). This means that the biomass at the beginning of the following year is

$$x_{n+1} = R_n e^{-F_n T} \quad (3)$$

and the total yield extracted during year  $n$  is

$$Y_n = R_n (1 - e^{-F_n T}). \quad (4)$$

The harvesting component is assumed to be deterministic, i.e. there is no noise in either the fishing mortality rate  $F_n$  or the yield  $Y_n$ .

Combining Eqs. (1) and (3) gives a stochastic mapping from the biomass at the beginning of one

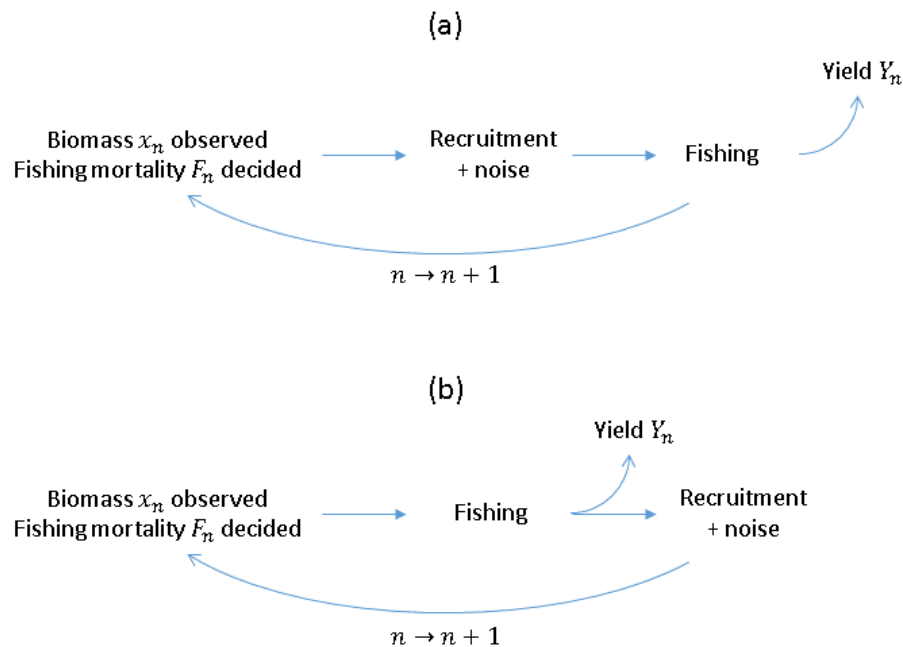

Figure 1: Schematic diagram showing two possible ways of modelling the annual sequence of biomass observation, recruitment and noise, and fishing. In (a), a fishing agent cannot distinguish the effects of noise from fishing by other agent(s). In (b), a fishing agent can infer perfectly the total fishing mortality applied by the other agent(s) because the combination of the biomass observation  $x_n$  at the start of year  $n$  and the yield  $Y_n$  in year  $n$  allow them to separate the effects of noise and fishing mortality. To avoid fishing agents having perfect information, we model the sequence as shown in (a).

year to the biomass at beginning of the next year:

$$x_{n+1} = \begin{cases} (f(x_n) + Z_n) e^{-F_n T}, & x_n > 0 \text{ \& } f(x_n) + Z_n > 0, \\ 0, & \text{otherwise.} \end{cases} \quad (5)$$

According to Eq. (5), if the biomass at the beginning of year  $n$  is  $x$  and fishing mortality rate in year  $n$  is  $F$ , then the probability density of having biomass  $y > 0$  in year  $n + 1$  is

$$p(y|x, F) = \frac{e^{FT}}{\sigma\sqrt{2\pi}} \exp\left(-\frac{(ye^{FT} - f(x))^2}{2\sigma^2}\right). \quad (6)$$

The probability of having zero biomass in year  $n + 1$  is given by  $1 - \int_0^\infty p(y|x, F) dy$ .

Figure 1 illustrates the sequence of biomass observation, recruitment, noise and fishing. It is possible to model this sequence in two different ways, either with recruitment and noise occurring before fishing (Fig. 1a) or vice versa (Fig. 1b). Under the first model, fishing agents must decide on their level of fishing effort before the stock biomass is affected by noise. Under the second model, fishing agents can effectively observe the sign and magnitude of that year's noise term before having to

decide their fishing effort. This makes a small difference to the optimal policies that the model produces because agents can better tune their effort levels to current environmental conditions. However, in the duopolist case (see Sec. 2.3), having knowledge of the stock biomass immediately before the fishing season begins means that each fishing agent can infer, with perfect accuracy, the actions of their competitor via their own yield. To retain some realistic uncertainty in beliefs about other agent's actions, we therefore use the sequence shown in Fig. 1a. This means that agents cannot observe the noise process directly and hence cannot distinguish the effects of noise and competitor actions.

## 2.2. Monopolist problem

We first consider the optimisation problem faced by a single agent with the ability to observe the biomass  $x_n$  at the beginning of each year and subsequently determine the total fishing mortality  $F_n$  to apply that year. This is a Markov decision process with continuous state variable  $x \geq 0$  and continuous action variable  $F \geq 0$ .

We assume that biomass extracted from the fishery has a unit price  $b$  so that the revenue in year  $n$  is  $bY_n$ , where  $Y_n$  is the yield in year  $n$  as defined in Eq. (4). Similarly, we assume that there is a cost  $c$  per unit fishing effort so that the expenditure in year  $n$  is  $cF_n$ . Hence, if the biomass at the beginning of the year is  $x$ , the fishing mortality rate is  $F$ , and the biomass at the beginning of the following year is  $y$  then the net profit  $P$  is

$$P(x, y, F) = by(e^{FT} - 1) - cF. \quad (7)$$

For generality, the profit function  $P$  is a function of the current state of the process ( $x$ ), the action taken ( $F$ ), and the subsequent state to which the process transitions ( $y$ ). In this case, because of the sequence shown in Fig. 1a, the profit is a deterministic function of the biomass at the end of the fishing period, i.e. the subsequent state of the process  $y$ , independent of the current state  $x$ .

For a time horizon of  $N$  years, the monopolist's problem is to choose a policy  $Q_n(x)$ , which specifies the fishing mortality  $F$  to apply when the biomass is state  $x$  in year  $n$  ( $n = 1, \dots, N$ ). An optimal policy is one that maximises the expected value of the total discounted profit

$$P_{\text{tot}} = \sum_{n=1}^N \delta^{n-1} P(x_n, x_{n+1}, F_n), \quad (8)$$

where  $\delta \in [0, 1]$  is the discount factor. This stochastic optimisation problem may be solved via the Bellman equation [55] for the expected future discounted profit  $V_n(x)$ , referred to as the value, when the biomass is  $x$  in year  $n$ . The Bellman equation expresses the value recursively as the expected profit in year  $n$ , plus the expected value in year  $n + 1$ , maximised over all possible actions in year  $n$ :

$$V_n(x) = \max_F \int_0^\infty (P(x, y, F) + \delta V_{n+1}(y)) p(y|x, F) dy, \quad n = 1, \dots, N, \quad (9)$$

The value  $V_{N+1}(x)$  in year  $N + 1$  is defined to be zero for all states  $x$ . This means that year  $N$  is the last year in which any revenue may be extracted from the resource. Note that the value  $V_n(0)$  of being in state  $x = 0$  is zero for all  $n$ . This is because, if the process is in state  $x = 0$  in year  $n$ , it will remain in state  $x = 0$  for all future years with probability 1, regardless of the actions taken. Hence no current or future revenue can possibly be extracted. The Bellman equation reduces a decision problem into smaller subproblems according to Bellman’s principle of optimality, which states that “an optimal policy has the property that whatever the initial state and initial decision are, the remaining decisions must constitute an optimal policy with regard to the state resulting from the first decision” [56].

We solve the Bellman equation by a method referred to as value iteration [14] as follows. Eq. (9) with  $n = N$  and for a given value of  $x$  is a deterministic optimisation problem over the one-dimensional action variable  $F$ . This allows calculation of the optimal policy, denoted  $Q_N^{\text{mono}}(x)$ , and the value function  $V_N(x)$  for year  $N$ . Once  $V_N(x)$  is known, Eq. (9) with  $n = N - 1$  can be solved to find  $Q_{N-1}^{\text{mono}}(x)$  and  $V_{N-1}(x)$ , and so on. Hence, Eq. (9) can be solved by backward induction in  $n$  to find the optimal policy  $Q_n^{\text{mono}}(x)$  for  $n = 1, \dots, N$ .

If the optimal policy converges such that  $Q_n^{\text{mono}}(x) = Q_{n+1}^{\text{mono}}(x)$ , it is referred to as a stationary optimal policy. Since the one-stage profits  $P(x, y, F)$  are bounded, a stationary optimal policy is guaranteed to exist (though may not be unique) [14]. In this case, we can calculate the stationary state distribution  $\pi(x)$  under the optimal policy via the eigenproblem:

$$\lambda\pi(x) = \int p(x|y, Q^{\text{mono}}(y)) \pi(y) dy. \quad (10)$$

Here,  $1 - \lambda$  is the probability per year that the process enters the absorbing state  $x = 0$ , meaning that the stock is extirpated, when it is in the stationary distribution and under the stationary optimal policy. If the value function also converges such that  $V_n(x) = V_{n+1}(x)$ , we can also calculate the expected long-term discounted return from fishing  $V$ . This is given by the expected value of  $V(x)$  when the process is in its stationary distribution:

$$V = \int V(x)\pi(x)dx. \quad (11)$$

### 2.3. Duopolist problem

We now consider the situation in which two agents must independently decide the fishing mortality to apply each year. The total fishing mortality in year  $n$  is  $F_n = F_n^{(1)} + F_n^{(2)}$ , where  $F_n^{(i)}$  is the fishing mortality applied by agent  $i \in \{1, 2\}$  in year  $n$ . In this case, the total yield is still determined by Eq. (4), but is now split between the two agents according to their relative fishing mortality rates. If the biomass at the beginning of the year is  $x$ , agent  $i$  applies fishing mortality  $F^{(i)}$ , and the biomass at the beginning of the following year is  $y$ , then the net profit  $P^{(i)}$  for agent  $i$  is

$$P^{(i)}(x, y, \mathbf{F}) = \frac{byF^{(i)}}{\sum F^{(j)}} \left( e^{\sum F^{(j)}T} - 1 \right) - cF^{(i)} \quad (12)$$

| Description                                                            | Symbol and value        |
|------------------------------------------------------------------------|-------------------------|
| Stock biomass at the start of year $n$ (relative to carrying capacity) | $x_n$                   |
| Fishing mortality                                                      | $F$                     |
| Policy specifying the fishing mortality in year $n$ at biomass $x$     | $Q_n(x)$                |
| Value to fishing agent in year $n$ of having biomass $x$               | $V_n(x)$                |
| Transition probability function                                        | $p(y x, F)$             |
| Stationary distribution of biomass                                     | $\pi(x)$                |
| Probability of survival per year in stationary distribution            | $\lambda$               |
| Expected value in stationary distribution                              | $V$                     |
| Noise level relative to carrying capacity                              | $\sigma$ (varied)       |
| Intrinsic population growth rate                                       | $r = 1 \text{ yr}^{-1}$ |
| Time period between recruitment events                                 | $T = 1 \text{ yr}$      |
| Cost per unit effort relative to unit price                            | $c = 0.25$              |
| Discount factor                                                        | $\delta = 0.9$          |

Table 1: Model variables and parameter values.

where  $\mathbf{F} = [F^{(1)}, F^{(2)}]$  and all summations are over  $j = 1, 2$ .

The duopolist's problem can also be formulated as a Bellman equation, conditional on knowing what action the other agent will take when the process is in a given state. Suppose that agent  $j$  applies fishing mortality  $F^{(j)}$ . Then the Bellman equation for agent  $i$  in year  $n$  is:

$$V_n^{(i)}(x) = \max_{F^{(i)}} \int_0^\infty \left( P^{(i)}(x, y, \mathbf{F}) + \delta V_{n+1}^{(i)}(y) \right) p\left(y|x, \sum F^{(j)}\right) dy, \quad n = 1, \dots, N, \quad (13)$$

The optimal fishing mortality for agent  $i$  when the process is in state  $x$  will depend on the fishing mortality applied by  $j$ . We call a pair of policies  $Q_n^{(i)}(x)$  ( $i = 1, 2$ ) in year  $n$  optimal policies if they are best responses to each other, i.e.  $F^{(i)} = Q_n^{(i)}(x)$  is the solution of Eq. (13) when  $F^{(j)} = Q_n^{(j)}(x)$ . By symmetry, there must be a pair of optimal policies that are the same for both agents, i.e.  $Q_n^{(i)} = Q_n^{(j)}$ . This constraint can be used to reduce Eq. (13) to a single-variable optimisation problem in each year (see Appendix A for details of solution method). As with the monopolist problem, the optimal policies are found via backward iteration in  $n$ . We denote the duopolist's optimal policy in year  $n$  by  $Q_n^{\text{duo}}(x)$ . If the duopolist's optimal policy converges to a stationary policy, we can calculate the stationary distribution, the probability of extirpation, and the expected long-term return from fishing via equations analogous to Eq. (10) and (11).

We set the carrying capacity to be  $K = 1$  and the unit price to be  $b = 1$ . This does not affect the generality of the model and effectively means that biomass  $x$  and the noise  $\sigma$  are measured as a proportion of the carrying capacity, and the cost per unit effort parameter  $c$  is a ratio of cost to unit price. Other parameter values are shown in Table 1.



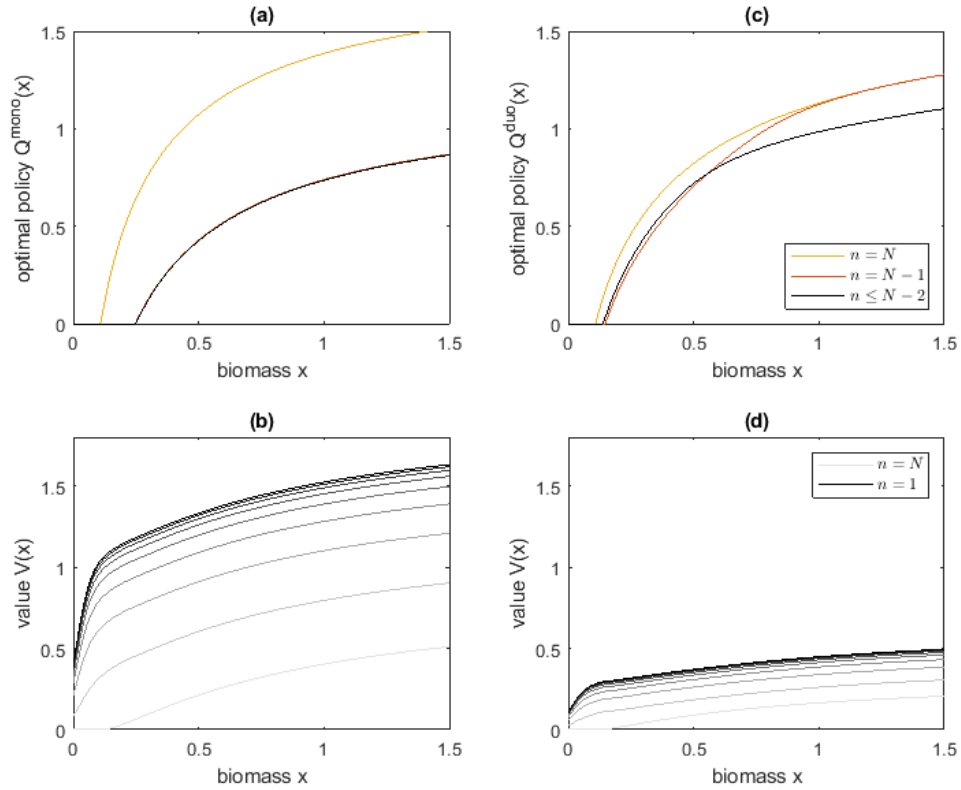

Figure 2: Solutions to the Markov decision process over a  $N = 40$  year period for: (a,b) a monopolist (c,d) and duoplist. (a,c) show the optimal policy in the final year (yellow), penultimate year (red), and preceding years (black) for which the optimal policy has converged to a stationary policy in both cases. (b,d) show the value function in the final year  $n = N$  (lightest shade) through to the first year  $n = 1$  (darkest shade) at 5 year intervals. Noise level  $\sigma = 0.1$ . Other parameter values shown in Table 1

## 2.4. Results

Figure 2 shows the monopolist's and duopolist's optimal policy and value function for a  $N = 40$  year period when  $\sigma = 0.1$ , i.e. the standard deviation of annual noise is 10% of the carrying capacity. The monopolist's optimal policy in the final year (yellow curve in Fig. 2a) maximises net profit in a single, fixed time period without regard to the biomass remaining at the end of this period. As expected, the optimal policy is always an increasing function of biomass, so it is optimal to fish harder when the stock biomass is high. As the process iterates backwards in time, the optimal policy quickly converges to a stationary policy: the policies in all years except the final year (black curve in Fig. 2a) are almost identical. In any given year, there is a threshold biomass below which it is optimal to cease fishing because the cost of fishing would exceed the revenue generated. In the final year ( $n = N$ ), the optimal fishing mortality is higher, and the threshold biomass for fishing is lower, than in preceding years ( $n \leq N - 1$ ). This is because in the final year there is no incentive to protect the stock for future periods. The value function increases as the process iterates backwards in time (darker curves in Fig. 2b) and eventually converges towards a stationary value, but this takes longer than convergence of the optimal policy.

The duopolist's optimal policy (Fig.2c) follows a similar shape to the monopolist's but, in all except the final year, specifies a higher fishing mortality for a given biomass  $x$ , and has a lower threshold biomass required for fishing. The value function for a duopolist (Fig.2d) is less than half that of the monopolist, indicating that the economic performance of the fishery as a whole is reduced when exploited by two non-cooperative agents. The duopolist's optimal policy converges to a stationary policy within 2 years of the final time period and, as in the monopolist case, the value function converges but more slowly. For the remainder of the paper, we focus on the stationary solution to the Markov decision process (i.e. long time horizon) found by solving the Bellman equation over a  $N = 40$  year period and examining the solution in year  $n = 1$ .

Figure 3 shows the monopolist's and duopolist's stationary optimal policy and value function, and the stationary biomass distribution, for a range of noise levels  $\sigma$ . When noise is small, the stationary biomass distribution under a monopolist (Fig. 3c) is tightly peaked, meaning there is little variation from year to year. The mean of the biomass distribution is slightly below the equilibrium biomass at maximum economic yield ( $B_{MEY}$ ) under the deterministic version of the model (vertical dotted line). This reference point is calculated by maximising the net profit when the biomass is at equilibrium and there is no noise ( $\sigma = 0$ ). The slight discrepancy is because the classical MEY solution does not discount future profits (although it can be adjusted to do so), so it is optimal to main stock biomass at a slightly higher level. The value of the resource to the monopolist with low noise (dark blue curve in Fig. 3b) also matches with the MEY prediction.

In the case of a duopoly, the optimal fishing mortality for each agent is higher than for a monopolist at the same stock biomass, and the threshold required for fishing is lower than for a monopolist (Fig. 3d). The mean of the stationary biomass distribution (Fig. 3f) is approximately half that under a monopolist, and the value is less than half that of the monopolist (Fig. 3e). This shows that two non-cooperative fishing agents will deplete the stock below optimal levels and receive sub-optimal returns.

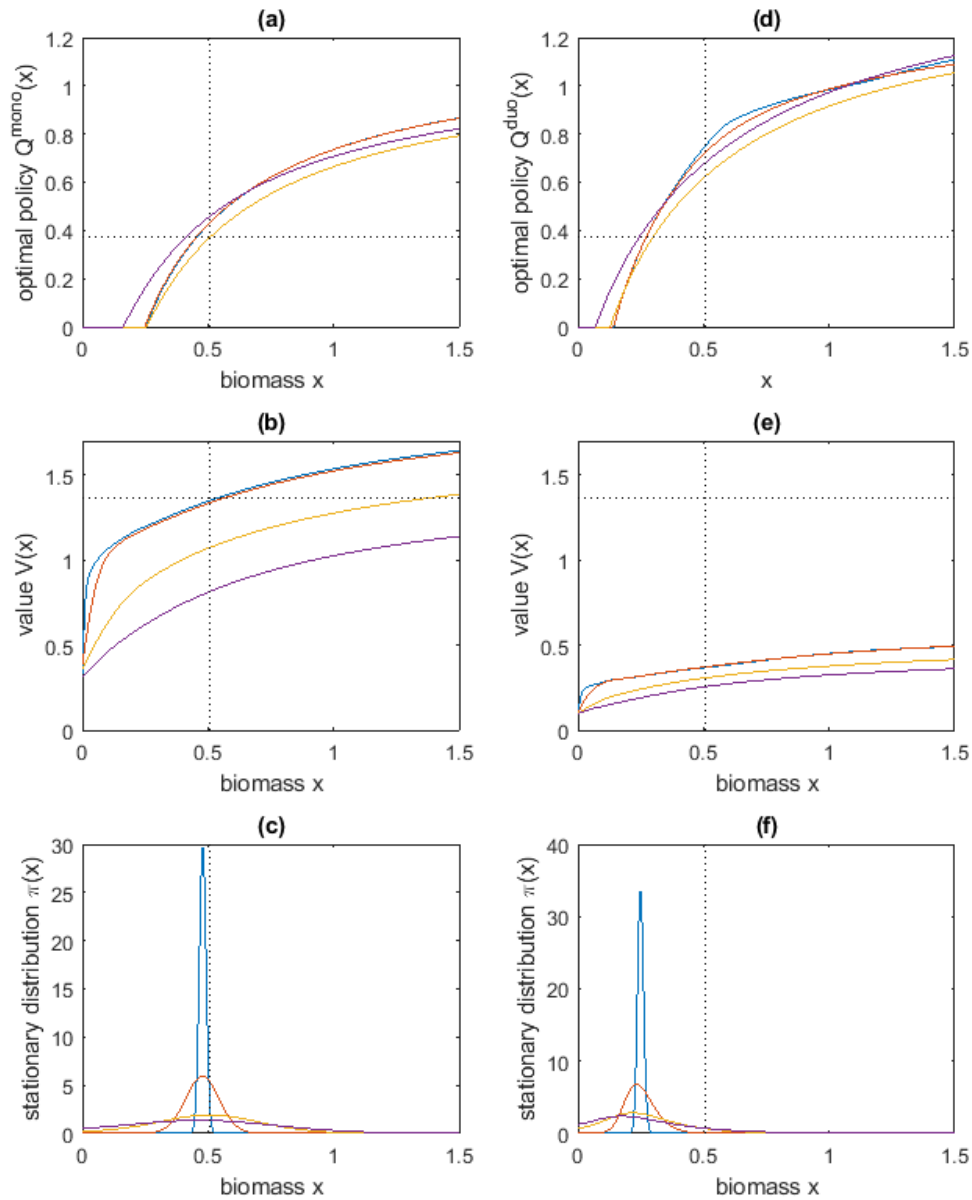

Figure 3: Effect of noise on the stationary optimal policy, value function and biomass distribution for: (a-c) a monopolist and (d-f) a duopolist. Noise levels  $\sigma = 0.02$  (dark blue),  $0.1$  (red),  $0.3$  (yellow),  $0.5$  (purple). Panels (a,d) show the stationary optimal policy; (b,e) show the stationary value function; (c,f) show the stationary biomass distribution. Dotted lines show the equilibrium biomass, fishing mortality and value corresponding to the maximum economic yield (MEY) in the deterministic monopolist case. Parameter values shown in Table 1

As noise increases, the shape of the optimal policy changes slightly and the threshold biomass required for fishing decreases (Fig. 3a,d). This reflects a detrimental consequence of noise on the bioeconomic dynamics. When noise is small, agents will avoid fishing in years when the biomass is low in order to protect future profits. However, when noise is larger, there is more uncertainty to future profits, so less of an incentive to protect them. Increasing noise also decreases the value function (Fig. 3b,e). This shows that higher profits in high biomass years do not offset the reduction in expected long-term profits due to the risk of extirpation of the stock.

### 3. Closed-loop strategies

The stochastic optimisation framework developed in Sec. 2 allows for open-loop strategies, in which agents can base their choice of action on the current state of the process, and the inferred current and future actions of their competitor, but not on previous actions or states [49]. This means that agents cannot directly respond to deviations by other agents from an equilibrium strategy. Closed-loop strategies, where an agent's actions may depend in part on their beliefs about the past actions of other agents, are less tractable analytically. Hence, in this section, we develop a stochastic agent-based model to investigate simple closed-loop strategies. We simulate the decision problem faced by a duopolist using an agent-based model with two agents.

#### 3.1. Agent-based model

The optimal policy for the duopolist found by solving Eq. (13) is an open-loop Nash equilibrium. In other words, in a given year and for a given biomass, neither agent can increase their expected discounted profit, over the time horizon of the process, by unilaterally changing to a different fishing mortality. In contrast, a Pareto efficient strategy set is one where it is impossible to increase one agent's expected return without decreasing the other agent's expected return. In our model, any combination of agent fishing mortalities such that  $F^{(i)} + F^{(j)} = Q_n^{\text{mono}}(x)$  is Pareto efficient. For simplicity, we focus only on the symmetric Pareto efficient solution, i.e.  $F^{(i)} = F^{(j)} = Q_n^{\text{mono}}(x)/2$ .

The existence of a Nash equilibrium and a Pareto efficient solution means that the duopolist's decision problem shares some characteristics of an iterated prisoner's dilemma. In reality, agents can choose from a continuum of fishing mortalities  $F^{(i)} \geq 0$ . However, for simplicity, in this section we assume that each year they make a binary choice of either: (i) fishing according to the Pareto efficient solution  $F^{(i)} = Q_n^{\text{mono}}(x)/2$ ; or (ii) fishing according to the Nash equilibrium  $F^{(i)} = Q_n^{\text{duo}}(x)$ . In keeping with the terminology of a prisoner's dilemma, we label these two actions "cooperate" and "defect" respectively.

We compare three simple strategies: always cooperate (ALLC), always defect (ALLD), and tit-for-tat (TFT). In the classic iterated prisoner's dilemma, each player can directly infer the action of their opponent in the previous round. TFT specifies that the player should cooperate in the first round and, in subsequent rounds, take the same action that their opponent took in the previous round [57]. This is known as a memory-one strategy as it requires the player to have memory

of their opponent's action one round previously. In our model, fishing agents cannot accurately infer the fishing mortality applied by the other agent in the previous round, because of noise. Nevertheless, agent  $i$  can calculate the anticipated yield in year  $n$  under the assumption their opponent cooperated, denoted  $Y_{\text{coop}}^{(i)}$ , and under the assumption their opponent agent defected, denoted  $Y_{\text{def}}^{(i)}$ :

$$Y_{\text{coop}}^{(i)} = f(x_n) \frac{F_n^{(i)}}{F_n^{(i)} + Q_n^{\text{mono}}(x_n)/2} \left( 1 - \exp \left( - \left( F_n^{(i)} + Q_n^{\text{mono}}(x_n)/2 \right) T \right) \right) \quad (14)$$

$$Y_{\text{def}}^{(i)} = f(x_n) \frac{F_n^{(i)}}{F_n^{(i)} + Q_n^{\text{duo}}(x_n)} \left( 1 - \exp \left( - \left( F_n^{(i)} + Q_n^{\text{duo}}(x_n) \right) T \right) \right) \quad (15)$$

The agent then observes their actual yield  $Y_n^{(i)}$  and we assume that they believe their opponent cooperated if  $Y_n^{(i)} > (Y_{\text{coop}}^{(i)} + Y_{\text{def}}^{(i)})/2$ , otherwise they believe their opponent defected.

For simplicity, we assume that the time-horizon is sufficiently long that the monopolist's and duopolist's optimal policies are stationary. Hence, for a given biomass  $x$ , the fishing mortalities corresponding to the cooperate action and the defect action are the same every year. A realisation of the agent-based model is simulated as follows:

1. Initialise the process by setting  $n = 1$ ,  $x_n = K$  and  $B^{(i)} = 1$  ( $i = 1, 2$ ).
2. Both agents observe  $x_n$ . Determine each agent's fishing mortality  $F^{(i)}$  according to  $x_n$  and the strategy they are following. An agent  $i$  playing TFT will cooperate if  $B^{(i)} = 1$  and defect if  $B^{(i)} = 0$ .
3. Calculate  $x_{n+1}$  via the stochastic map in Eq. (5).
4. Calculate each agent's yield  $Y_n^{(i)}$  and net profit  $P_n^{(i)}$  via Eq. (12).
5. For an agent playing TFT, calculate the anticipated yield under assumption the other agent cooperated ( $Y_{\text{coop}}^{(i)}$ ), and under the assumption the other agent defected ( $Y_{\text{def}}^{(i)}$ ) via Eqs. (14) and (15). Update agent's belief by setting  $B^{(i)} = 1$  if  $Y_n^{(i)} > (Y_{\text{coop}}^{(i)} + Y_{\text{def}}^{(i)})/2$  and  $B^{(i)} = 0$  otherwise.
6. Increase  $n$  by 1 and repeat steps 2–6 until  $n = n_{\text{max}}$  or  $x_n = 0$ .

An initial burn-in period of  $n_0$  years is discarded. For each realisation, we calculate each agent's total discounted profit,

$$P_{\text{tot}}^{(i)} = \sum_{n=1}^{n_{\text{max}}} \delta^{n-1} P_n^{(i)}, \quad (16)$$

We also calculate the average probability of extirpation of the stock per year. These outputs are averaged over  $M$  independent realisations of the process. Any realisation in which the stock is extirpated before the end of the burn-in period is discarded.

### 3.2. Results

We simulated the agent-based model in three cases: both agents playing ALLC; both agents playing ALLD; and both agents playing TFT. Figure 4 compares agent-based model simulations with results

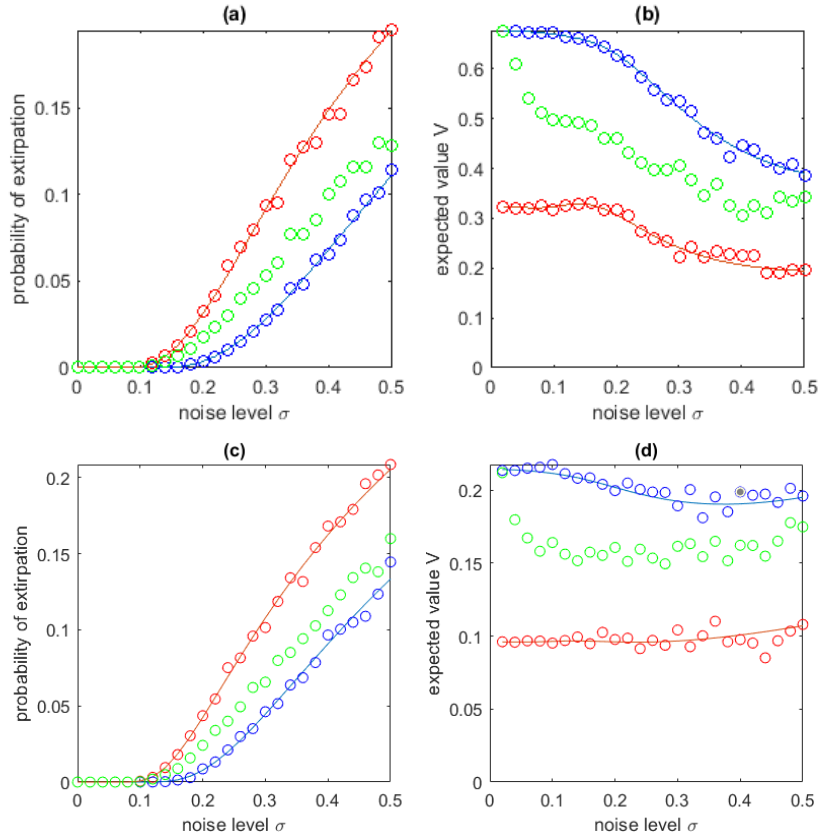

Figure 4: Comparison of Markov decision process solutions (solid curves) with agent-based model simulations (points): (a,c) probability of extirpation per year  $1 - \lambda$ ; (b,d) expected value (i.e. average long-term return from fishing). Discount factor in (a,c)  $\delta = 0.9$ ; (b,d)  $\delta = 0.7$ . Blue curves show the results from the Markov decision process at the Pareto efficient solution  $F^{(i)} = Q_n^{\text{mono}}(x)/2$ ; blue points show the agent-based simulation results for two agents playing ALLC. Red curves show the results from the Markov decision process under the Nash equilibrium  $F^{(i)} = Q_n^{\text{duo}}(x)$ ; red points show the agent-based simulation results for two agents playing ALLD. Green points show the agent-based simulation results for two agents playing TFT. The agent-based model was simulated for a  $n_0 = 20$  year burn-in period which was discarded, followed by a  $n_{\text{max}} = 100$  year period, and results are averaged over  $M = 500$  independent realisations, discarding any realisation in which the stock is extirpated before the end of the burn-in period. Parameter values shown in Table 1

from the Markov decision process from Sec. 2. With cooperative behaviour (ALLC, blue), the agent-based model agrees well with the Markov decision process under the monopolist's optimal policy. With uncooperative behaviour (ALLD, red), simulations agree with the results of the duopolist's Nash equilibrium. In both cases, noise levels below around 10% of carrying capacity do not appreciably affect the expected value (i.e. the average long-term return from fishing). This is because the probability of extirpation is negligible at these noise levels and, in the long run, the increased profit in high biomass years balances the reduced profit in low biomass years. However, increasing noise above around 10% of carrying capacity increases the probability of extirpation and therefore reduces the expected value. The probability of extirpation is higher under uncooperative behaviour than under cooperative behaviour, because the aggregate fishing mortality is higher and the equilibrium average biomass is lower, as shown by Fig. 3.

Under tit-for-tat (TFT, green), the expected value gets close to the cooperative outcome when noise is very small. However, as noise increases, the expected value rapidly drops and ends up approximately midway between the cooperative and non-cooperative outcomes. Interestingly, noise impacts the performance of TFT relative to the Pareto efficient ALLC before it affects the expected value from ALLC itself. This shows that even small amounts of noise make sustained cooperation more difficult.

The results in Figure 4(a,b) are for a discount factor of  $\delta = 0.9$ . For comparison, we also solved the Markov decision process and simulated the agent-based model for discount factors of 0.7 and 0.95. When the discount factor is high, agents fish at slightly lower levels to protect biomass and therefore profits in future years. However, the effect of noise is similar to that seen in Fig. 4(a,b). When the discount factor is low ( $\delta = 0.7$ , Fig. 4(c,d)), agents attach less value to profits in future years. This greatly reduces the effect of noise on the expected value, because extirpation at some future time is less important from the point of view of a short-sighted agent. However, the probability of extirpation is higher than the  $\delta = 0.9$  case, as a consequence of the higher average fishing mortality.

The model can also be used to simulate two agents playing different strategies. At low noise levels, the results of this are as expected from the classical iterated prisoner's dilemma: ALLC vs ALLD results in a large advantage for the defector; ALLC vs TFT results in both agents always cooperating; ALLD vs TFT results in both agents always defecting. As noise increases, the actions of an agent playing TFT become increasingly determined by noise in the biomass signal and less sensitive to the actions of their opponent. This is the core reason why TFT ceases to be effective in the presence of noise.

#### 4. Discussion

We have developed a stochastic optimisation framework for determining the optimal fishing effort for either a monopolist or duopolist operating in a noisy environment. A solution to the monopolist's Markov decision process is a type of harvest control rule. This is an increasingly used fisheries management tool that specifies biomass reference points at which increasingly strict controls on fishing are imposed [58]. Our model assumes that fishing agents or managers can accurately observe

the stock biomass once during the annual cycle of recruitment and fishing. Biomass estimates are often inaccurate due to a lack of data [21] or to measuring proxy variables such as catch per unit effort rather than biomass itself. Real fisheries have many other sources of noise operating in both the population dynamics and the harvesting process. We have studied the effect of including density-independent, normally distributed noise in a single model component, the annual stock-recruitment relationship. Our model provides a natural framework for including other sources of variability, such as uncertainty in biomass observations [58], noise in fishing mortality due to spatial heterogeneity or variations in catchability, or density-dependent noise [19]. Nevertheless, considering noise in annual recruitment is a reasonable starting point as this is the largest single source of unexplained variability in most fish stocks [13, 23, 54].

In both the monopolist and duopolist case, our results show that there is a threshold stock biomass below which it is optimal to stop fishing until the stock recovers. This threshold is lower for a duopolist than for a monopolist. Correspondingly, the stock has a lower equilibrium average biomass and a higher probability of extirpation under a duopolist than under a monopolist. The duopolist solution is optimal in the sense of being a Nash equilibrium, that is neither player can increase their expected profit by unilaterally changing their fishing effort. However, this solution is not Pareto efficient, meaning that both players could obtain a higher profit by cooperatively reducing their fishing effort. Thus the duopolist's decision problem contains the structure of an iterated prisoner's dilemma.

We used an agent-based model to test the effectiveness of a simple, strategy based on punishment of a player who defects from a cooperative solution, also known as a threat policy [27]. Our results quantify the likelihood of punishment being triggered by environmental noise and the long-term effect on fisheries-level outcomes. Although this strategy is effective in maintaining mutual cooperation when noise is very small, its performance rapidly drops as the noise level increases and swamps the player's ability to discern any accurate information about their opponent's actions. This shows that, unless players are able to make enforceable agreements about fishing effort, sustaining cooperation in a noisy environment is difficult.

Other punishment-based strategies exist, such as a grim trigger, where a single perceived defection by an opponent triggers the player to defect for the remainder of the process, or generous tit-for-tat, which has some probability of forgiving a perceived defection. More complex strategies could also be developed that have memory of more than one round, or have a more nuanced punishment regime than just a binary choice between the Nash equilibrium and Pareto efficient fishing efforts. These could be simulated using our agent-based model.

Our finding that sustained cooperation of autonomous fishing agents is difficult is an example of Hardin's tragedy of the commons [59]. This appears to be an argument in favour of centralised controls on fishing mortality, and there are certainly many cases where these are necessary to prevent overfishing [60]. However, there are also documented cases where community management has been effective [61], particularly in small-scale fisheries [62]. We acknowledge that game theoretic models that assume selfish economic rationality do not always capture the nuances of human behaviour [63, 64].



Our models assumes that players have symmetric costs, prices and information for players. Relaxing some of these assumptions would be an interesting extension would to the study. In many asymmetric situations, side-payments become part of the optimal policy, for example an agent with a higher price to cost ratio will pay another agent to reduce their fishing effort [25, 26]. Other potential model extensions include a multi-species fishery, harvesting by multiple agents, and age- or size-structured populations.

## Acknowledgements

MH's PhD scholarship was funded jointly by the University of Canterbury and Te Pūnaha Matatini. AJ and MJP acknowledge financial support from Te Pūnaha Matatini. The authors or grateful to Dr Suzi Kerr and Dr Tava Olsen for discussions about the research and to Dr Mark Fackrell and Dr Mark McGuinness for comments on an earlier version of the manuscript.

## References

- [1] J. Hjort, Fluctuations in the great fisheries of northern Europe viewed in the light of biological research, in: *Rapports et Procès-Verbaux des Réunions*, vol. XX, ICES, 1914.
- [2] P. J. Doherty, D. M. Williams, The replenishment of coral reef fish populations, *Oceanogr Mar Biol Annu Rev* 26 (48) (1988) 551.
- [3] P. Lehodey, J. Alheit, M. Barange, T. Baumgartner, G. Beaugrand, K. Drinkwater, J.-M. Fromentin, S. Hare, G. Ottersen, R. Perry, et al., Climate variability, fish, and fisheries, *Journal of Climate* 19 (20) (2006) 5009–5030.
- [4] C. M. O'Brien, C. J. Fox, B. Planque, J. Casey, Fisheries: climate variability and North Sea cod, *Nature* 404 (6774) (2000) 142.
- [5] J. J. Pritt, E. F. Roseman, T. P. O'brien, Mechanisms driving recruitment variability in fish: comparisons between the Laurentian Great Lakes and marine systems, *ICES Journal of Marine Science* 71 (8) (2014) 2252–2267.
- [6] S. E. Swearer, J. E. Caselle, D. W. Lea, R. R. Warner, Larval retention and recruitment in an island population of a coral-reef fish, *Nature* 402 (6763) (1999) 799.
- [7] J. A. Wiens, Population responses to patchy environments, *Annual Review of Ecology and Systematics* 7 (1) (1976) 81–120.
- [8] S. A. Levin, Population dynamic models in heterogeneous environments, *Annual Review of Ecology and Systematics* 7 (1) (1976) 287–310.
- [9] A. Lomnicki, Individual differences between animals and the natural regulation of their numbers, *The Journal of Animal Ecology* (1978) 461–475.

- [10] J. A. Tyler, K. A. Rose, Individual variability and spatial heterogeneity in fish population models, *Reviews in Fish Biology and Fisheries* 4 (1) (1994) 91–123.
- [11] E. Houde, R. Hoyt, Fish early life dynamics and recruitment variability, *Trans. Am. Fish. Soc* .
- [12] P. Pepin, R. A. Myers, Significance of egg and larval size to recruitment variability of temperate marine fish, *Canadian Journal of Fisheries and Aquatic Sciences* 48 (10) (1991) 1820–1828.
- [13] M. J. Fogarty, M. P. Sissenwine, E. B. Cohen, Recruitment variability and the dynamics of exploited marine populations, *Trends in Ecology & Evolution* 6 (8) (1991) 241–246.
- [14] M. L. Puterman, *Markov Decision Processes: Discrete Stochastic Dynamic Programming*, John Wiley & Sons, 2014.
- [15] D. J. White, Real applications of Markov decision processes, *Interfaces* 15 (6) (1985) 73–83.
- [16] D. J. White, A survey of applications of Markov decision processes, *Journal of the Operational Research Society* 44 (11) (1993) 1073–1096.
- [17] R. Mendelsohn, Using Markov decision models and related techniques for purposes other than simple optimization: analyzing the consequences of policy alternatives on the management of salmon runs, *Fishery Bull.* 78 (1) (1980) 35–50.
- [18] R. Mendelsohn, Discount factors and risk aversion in managing random fish populations, *Canadian Journal of Fisheries and Aquatic Sciences* 39 (9) (1982) 1252–1257.
- [19] R. Mendelsohn, Optimal harvesting strategies for stochastic single-species, multiage class models, *Mathematical Biosciences* 41 (3-4) (1978) 159–174.
- [20] S. H. Mann, A mathematical theory for the harvest of natural animal populations when birth rates are dependent on total population size, *Mathematical Biosciences* 7 (1-2) (1970) 97–110.
- [21] M. Sobel, Stochastic fishery games with myopic equilibria, *Essays in the Economics of Renewable Resources* (1982) 259–268.
- [22] D. E. Lane, A partially observable model of decision making by fishermen, *Operations Research* 37 (2) (1989) 240–254.
- [23] P. Sparre, S. C. Venema, *Introduction to tropical fish stock assessment. Part 1. Manual*, FAO Fisheries Technical Paper 306.1, Rev. 2, Food and Agriculture Organisation, Rome, 1998.
- [24] M. Bailey, U. R. Sumaila, M. Lindroos, Application of game theory to fisheries over three decades, *Fisheries Research* 102 (1) (2010) 1–8.
- [25] R. McKelvey, Game-Theoretic Insights into the International Management of Fisheries, *Natural Resource Modeling* 10 (2) (1997) 129–171.
- [26] G. R. Munro, The optimal management of transboundary renewable resources, *Canadian Journal of Economics* (1979) 355–376.

- [27] V. Kaitala, M. Pohjola, Optimal recovery of a shared resource stock: a differential game model with efficient memory equilibria, *Natural Resource Modeling* 3 (1) (1988) 91–119.
- [28] C. Chiarella, M. C. Kemp, N. Van Long, K. Okuguchi, On the economics of international fisheries, in: *Contributions to Economic Analysis*, vol. 150, Elsevier, 189–198, 1984.
- [29] U. R. Sumaila, A review of game-theoretic models of fishing, *Marine Policy* 23 (1) (1999) 1–10.
- [30] G. Martin-Herran, J. P. Rincón-Zapatero, Efficient Markov perfect Nash equilibria: theory and application to dynamic fishery games, *Journal of Economic Dynamics and Control* 29 (6) (2005) 1073–1096.
- [31] M. J. Plank, J. Kolding, R. Law, H. D. Gerritsen, D. Reid, Balanced harvesting can emerge from fishing decisions by individual fishers in a small-scale fishery, *Fish and Fisheries* .
- [32] M. Hackney, A. James, M. J. Plank, Emergence of balanced harvesting in an agent-based model of an open-access small-scale fishery, *Mathematical biosciences* 316 (2019) 108245.
- [33] S. D. Fretwell, H. L. Lucas Jr., On territorial behavior and other factors influencing habitat distribution in birds. I. Theoretical development, *Acta Biotheoretica* 19 (1969) 16–36.
- [34] J. M. Smith, *Evolution and the Theory of Games*, Cambridge university press, 1982.
- [35] K. Regelman, Competitive resource sharing: a simulation model, *Animal Behaviour* 32 (1) (1984) 226–232.
- [36] A. Kacelnik, J. R. Krebs, C. Bernstein, The ideal free distribution and predator-prey populations, *Trends in Ecology and Evolution* 7 (2) (1992) 50–55.
- [37] D. M. Gillis, R. M. Peterman, A. V. Tyler, Movement dynamics in a fishery: application of the ideal free distribution to spatial allocation of effort, *Canadian Journal of Fisheries and Aquatic Sciences* 50 (2) (1993) 323–333.
- [38] D. M. Gillis, A. van der Lee, Advancing the application of the ideal free distribution to spatial models of fishing effort: the isodar approach, *Canadian Journal of Fisheries and Aquatic Sciences* 69 (10) (2012) 1610–1620.
- [39] I. E. van Putten, S. Kulmala, O. Thébaud, N. Dowling, K. G. Hamon, T. Hutton, S. Pascoe, Theories and behavioural drivers underlying fleet dynamics models, *Fish and Fisheries* 13 (2) (2012) 216–235.
- [40] M. J. Sobel, Myopic solutions of Markov decision processes and stochastic games, *Operations Research* 29 (5) (1981) 995–1009.
- [41] M. L. Littman, Markov games as a framework for multi-agent reinforcement learning, in: *Machine Learning Proceedings 1994*, Elsevier, 157–163, 1994.
- [42] M. Bowling, M. Veloso, An analysis of stochastic game theory for multiagent reinforcement learning, Tech. Rep., Carnegie-Mellon Univ, Pittsburgh P.A., School of Computer Science, 2000.

- [43] M. Zinkevich, A. Greenwald, M. L. Littman, Cyclic equilibria in Markov games, in: *Advances in Neural Information Processing Systems*, 1641–1648, 2006.
- [44] J. Filar, K. Vrieze, *Competitive Markov Decision Processes*, Springer Science & Business Media, 2012.
- [45] O. J. Vrieze, *Stochastic games with finite state and action spaces*, CWI tracts .
- [46] J. Hu, M. P. Wellman, Nash Q-learning for general-sum stochastic games, *Journal of machine learning research* 4 (Nov) (2003) 1039–1069.
- [47] J. Hu, M. P. Wellman, et al., Multiagent reinforcement learning: theoretical framework and an algorithm., in: *ICML*, vol. 98, Citeseer, 242–250, 1998.
- [48] M. L. Littman, Value-function reinforcement learning in Markov games, *Cognitive Systems Research* 2 (1) (2001) 55–66.
- [49] D. Fudenberg, J. Tirole, *Game Theory*, Cambridge, Massachusetts. MIT press, 1991.
- [50] D. Booth, G. Beretta, Seasonal recruitment, habitat associations and survival of pomacentrid reef fish in the US Virgin Islands, *Coral Reefs* 13 (2) (1994) 81–89.
- [51] D. M. Allen, D. L. Barker, Interannual variations in larval fish recruitment to estuarine epibenthic habitats., *Marine Ecology Progress Series*. Oldendorf 63 (2) (1990) 113–125.
- [52] S. E. Campana, Year-class strength and growth rate in young Atlantic cod *Gadus morhua*, *Marine Ecology Progress Series* 135 (1996) 21–26.
- [53] D. O. Conover, T. M. Present, Countergradient variation in growth rate: compensation for length of the growing season among Atlantic silversides from different latitudes, *Oecologia* 83 (3) (1990) 316–324.
- [54] R. J. Beverton, S. J. Holt, *On the dynamics of exploited fish populations*, vol. 11, Springer Science & Business Media, 1957/2012.
- [55] R. Bellman, et al., The theory of dynamic programming, *Bulletin of the American Mathematical Society* 60 (6) (1954) 503–515.
- [56] R. Bellman, *Dynamic programming*, *Science* 153 (3731) (1966) 34–37.
- [57] R. Axelrod, The evolution of strategies in the iterated prisoners dilemma, *The Dynamics of Norms* (1987) 1–16.
- [58] S. F. Kvamsdal, A. Eide, N.-A. Ekerhovd, K. Enberg, A. Gudmundsdottir, A. H. Hoel, K. E. Mills, F. J. Mueter, L. Ravn-Jonsen, L. K. Sandal, et al., Harvest control rules in modern fisheries management, *Elementa Science of the Anthropocene* 4 (2016) 000114.
- [59] G. Hardin, The Tragedy of the Commons, *Science* 162 (3859) (1968) 1243–1248.
- [60] R. Hilborn, D. Ovando, Reflections on the success of traditional fisheries management, *ICES journal of Marine Science* 71 (5) (2014) 1040–1046.

- [61] E. Ostrom, *Governing the commons: The evolution of institutions for collective action*, Cambridge University Press, Cambridge, 1990.
- [62] J. Kolding, P. A. M. van Zwieten, The tragedy of our legacy: How do global management discourses affect small scale fisheries in the South?, *Forum for Development Studies* 38 (2011) 267–297.
- [63] E. A. Fulton, A. D. M. Smith, D. C. Smith, I. E. van Putten, Human behaviour: the key source of uncertainty in fisheries management, *Fish and fisheries* 12 (1) (2011) 2–17.
- [64] A. Mashanova, R. Law, Resource dynamics, social interactions, and the tragedy of the commons, in: H. Liljenstrom, U. Svedin (Eds.), *Micro, Meso, Macro: Addressing Complex Systems Couplings*, World Scientific, Singapore, 171–183, 2005.

## Appendix A. Solution of the Bellman equation

The Bellman equation takes the form

$$V_n(x) = \max_F L(x, F), \quad (\text{A.1})$$

where, for the monopolist problem, using Eq. (7) gives

$$L(x, F) = -cF + b(1 - e^{-FT})\mu(x) + \delta \int_0^\infty V_{n+1}(y)p(y|x, F)dy, \quad (\text{A.2})$$

where  $\mu(x)$  is the expected value of the stochastic Beverton–Holt map defined by Eq. (1), given by

$$\mu(x) = \frac{f(x)}{2} \left( 1 + \operatorname{erf} \left( \frac{f(x)}{\sqrt{2}\sigma} \right) \right) + \frac{\sigma}{\sqrt{2\pi}} e^{-\frac{f(x)^2}{2\sigma^2}}. \quad (\text{A.3})$$

Note that if the variable  $x$  were unconstrained, the expected value of the stochastic map would just be the deterministic Beverton–Holt map  $f(x)$ . However, because Eq. (1) constrains  $x$  to take non-negative values,  $\mu(x)$  is greater than  $f(x)$ .

Differentiating  $L(x, F)$  with respect to the action variable  $F$  gives

$$\frac{\partial L}{\partial F} = -c + bTe^{-FT}\mu(x) + \delta \int_0^\infty V_{n+1}(y)q(y|x, F)dy, \quad (\text{A.4})$$

where

$$q(y|x, F) = \frac{\partial}{\partial F} p(y|x, F) = \frac{Te^{FT}}{\sigma\sqrt{2\pi}} \left( 1 - \frac{ye^{FT}(ye^{FT} - f(x))}{\sigma^2} \right) \exp \left( -\frac{(ye^{FT} - f(x))^2}{2\sigma^2} \right) \quad (\text{A.5})$$

It can be shown that  $\partial^2 L / \partial F^2 < 0$ . Hence, for a given  $x$ , there are two possibilities: (i) if

$\lim_{F \rightarrow 0} \partial L / \partial F > 0$  then the optimal fishing mortality is the unique positive root of  $\partial L / \partial F = 0$ ;  
(ii) if  $\lim_{F \rightarrow 0} \partial L / \partial F < 0$  then the optimal fishing mortality is  $F = 0$ .

The same approach can be taken to the multi-agent version of the problem. In the general case with  $m$  agents, the Bellman equation takes the form

$$V_n^{(i)}(x) = \max_F L^{(i)}(x, \mathbf{F}), \quad (\text{A.6})$$

where  $\mathbf{F} = [F^{(1)}, \dots, F^{(m)}]$ .

$$L^{(i)}(x, \mathbf{F}) = -cF^{(i)} + \frac{bF^{(i)} \left(1 - e^{-\sum F^{(j)}T}\right) \mu(x)}{\sum F^{(j)}} + \delta \int_0^\infty V_{n+1}^{(i)}(y) p(y|x, \sum F^{(j)}) dy, \quad (\text{A.7})$$

where all summations are over  $j = 1, \dots, m$  unless otherwise specified.

Differentiating  $L$  with respect to the action variable  $F^{(i)}$  gives

$$\begin{aligned} \frac{\partial L^{(i)}}{\partial F^{(i)}} &= -c + b\mu(x) \left( \left(1 - e^{-\sum F^{(j)}T}\right) \frac{\sum_{j \neq i} F^{(j)}}{(\sum F^{(j)})^2} + \frac{TF^{(i)} e^{-\sum F^{(j)}T}}{\sum F^{(j)}} \right) \\ &+ \delta \int_0^\infty V_{n+1}^{(i)}(y) q(y|x, \sum F^{(j)}) dy, \end{aligned} \quad (\text{A.8})$$

where  $q(y|x, F)$  is given by Eq. (A.5) as previously. By symmetry, the optimal policy must be the same for each agent  $i$ . Therefore we require a solution of  $\partial L^{(i)} / \partial F^{(i)} = 0$  satisfying  $F^{(i)} = F^{(j)} = F$  for all  $i, j$ . Thus the optimal fishing mortality for an agent when the biomass is  $x$  in year  $n$  is given by the root  $F$  of  $M(x, F) = 0$  where:

$$M(x, F) = -c + b\mu(x) \left( \left(1 - e^{-mFT}\right) \frac{(m-1)}{m^2F} + \frac{Te^{-mFT}}{m} \right) + \delta \int_0^\infty V_{n+1}^{(i)}(y) q(y|x, mF) dy. \quad (\text{A.9})$$

It can be shown that  $\partial M / \partial F < 0$ , so again there are two possibilities: (i) if  $\lim_{F \rightarrow 0} M(x, F) > 0$  then the optimal fishing mortality is the unique positive root of Eq. (A.9); (ii) if  $\lim_{F \rightarrow 0} M(x, F) < 0$  then the optimal fishing mortality is  $F = 0$ . The duopolist's optimal policy is found by setting  $m = 2$ .

### Numerical methods

Solutions of the Bellman equation are calculated numerically by truncating the state variable  $x$  at  $x = x_{\max} = 2$  and discretising with step size  $\delta x = 0.0025$ .

In year  $n$  and for each  $x_k$ , the value of  $\lim_{F \rightarrow 0} M(x_k, F)$  is calculated. If this negative, then the optimal policy  $Q_n(x_k)$  is 0, otherwise  $Q_n(x_k)$  is the unique positive root of Eq. (A.9), which is found using Matlab's single-variable root-finding routine *fzero*. Once the optimal policy is known,

the value function  $V_n(x_k)$  is calculated according to Eq. (A.7) with  $F^{(j)} = Q_n(x_k)$  for all agents  $j$ . This means that the value function is tabulated at  $x = x_k$  and so the integrals in Eqs. (A.7) and (A.9) are evaluated using the trapezium rule with step size  $\delta x$ .

The value of  $x_{\max} = 2$  is sufficiently large that, for the noise levels considered, there is a very small probability that the biomass exceeds this. Reducing the step size to  $\delta x = 0.001$  had a negligible effect on the results.
